# Supplementary material for: Drinking Behaviour of Beef Cattle Subject to Water Medication in Various Environmental Conditions
Source: MDPI journal article supplement (doi:10.3390/ruminants4020015), 2024-04-17
Supplement: s1 [file s1]

**Table S1.** Weather data (temperatures, humidity, rainfall, wind information, pressures) from Wilburra Downs (Richmond, QLD – Australia) during all experimental period (September 2023 until 19 December 2023) obtained from Bureau of Meteorology [10].

| Date    | Temp |      | Rain | Max wind gust    |                  |       | 9:00 AM |                 |                  |                  |                   | 3:00 PM |                 |                  |                  |                   |
|---------|------|------|------|------------------|------------------|-------|---------|-----------------|------------------|------------------|-------------------|---------|-----------------|------------------|------------------|-------------------|
|         | Min  | Max  |      | Dir <sup>1</sup> | Spd <sup>2</sup> | Time  | Temp    | RH <sup>3</sup> | Dir <sup>1</sup> | Spd <sup>2</sup> | MSLP <sup>4</sup> | Temp    | RH <sup>3</sup> | Dir <sup>1</sup> | Spd <sup>2</sup> | MSLP <sup>4</sup> |
|         | °C   | °C   |      | km/h             | Local            |       | °C      | %               | km/h             |                  | hPa               | °C      | %               | km/h             |                  | hPa               |
| 1-Sept  | 9.1  | 31.7 | 0    | NW               | 43               | 15:02 | 21.2    | 28              | NE               | 24               | 1018.5            | 31      | 12              | NNW              | 13               | 1013.5            |
| 2-Sept  | 7.9  | 33.2 | 0    | NE               | 31               | 10:43 | 21.5    | 25              | NNE              | 15               | 1016.9            | 32.8    | 11              | NW               | 9                | 1011.9            |
| 3-Sept  | 9.1  | 33.1 | 0    | NNW              | 41               | 09:41 | 24.6    | 27              | N                | 24               | 1016.8            | 32.8    | 14              | NNW              | 13               | 1011.8            |
| 4-Sept  | 14.2 | 33   | 0    | NW               | 43               | 11:22 | 22.7    | 41              | N                | 19               | 1016.9            | 32      | 17              | NNE              | 17               | 1012.2            |
| 5-Sept  | 12.9 | 34.6 | 0    | NNE              | 48               | 16:02 | 24.8    | 32              | WSW              | 19               | 1017.2            | 33.8    | 16              | E                | 7                | 1013              |
| 6-Sept  | 14.5 | 35.9 | 0    | ENE              | 39               | 15:18 | 25.9    | 27              | NE               | 11               | 1017              | 34.9    | 11              | E                | 17               | 1012.6            |
| 7-Sept  | 15.8 | 35.8 | 0    | ENE              | 28               | 14:50 | 24.6    | 37              | N                | 7                | 1017.5            | 35      | 10              | SE               | 13               | 1012.8            |
| 8-Sept  | 13.6 | 34.9 | 0    | SSE              | 44               | 16:22 | 25      | 36              | SE               | 20               | 1019.6            | 34.5    | 22              | SSE              | 22               | 1015.4            |
| 9-Sept  | 15.3 | 35.3 | 0    | SSE              | 39               | 15:43 | 22.2    | 20              | E                | 22               | 1021.6            | 35      | 17              | ESE              | 28               | 1015.1            |
| 10-Sept | 15.1 | 34.2 | 0    | ESE              | 43               | 23:59 | 24.5    | 29              | ENE              | 13               | 1019.9            | 32.8    | 20              | SSE              | 19               | 1015.9            |
| 11-Sept | 17.2 | 32.2 | 0    | ESE              | 44               | 00:01 | 23.5    | 44              | ENE              | 17               | 1020.8            | 30.9    | 26              | ESE              | 20               | 1016.3            |
| 12-Sept | 14.1 | 30.1 | 0    | ENE              | 61               | 10:43 | 23.1    | 39              | ENE              | 31               | 1022.6            | 28.8    | 19              | NNE              | 31               | 1018.3            |
| 13-Sept | 13.5 | 30.6 | 0    | NE               | 59               | 10:19 | 22.6    | 37              | NE               | 28               | 1024              | 29.6    | 18              | NE               | 26               | 1018.8            |
| 14-Sept | 12   | 31.6 | 0    | NE               | 52               | 10:33 | 23.7    | 33              | NE               | 20               | 1024              | 30.9    | 15              | SSW              | 7                | 1018.4            |

|            |      |      |   |         |    |       |      |    |         |    |        |      |    |         |    |        |
|------------|------|------|---|---------|----|-------|------|----|---------|----|--------|------|----|---------|----|--------|
| 15-Se<br>P | 10   | 32.4 | 0 | ESE     | 44 | 13:09 | 23.4 | 37 | NN<br>E | 19 | 1023.1 | 31.2 | 18 | ESE     | 26 | 1018   |
| 16-Se<br>P | 9.3  | 32.9 | 0 | ESE     | 54 | 12:04 | 23.1 | 38 | NE      | 11 | 1021.8 | 32.6 | 14 | E       | 24 | 1016.5 |
| 17-Se<br>P | 14.2 | 32.2 | 0 | E       | 52 | 13:23 | 24.1 | 37 | NE      | 22 | 1021.8 | 31.8 | 15 | ESE     | 24 | 1015.9 |
| 18-Se<br>P | 12.2 | 33.9 | 0 | N       | 35 | 15:10 | 25.6 | 36 | ENE     | 19 | 1019   | 33   | 18 | NW      | 9  | 1013.5 |
| 19-Se<br>P | 16.3 | 34.2 | 0 | WS<br>W | 28 | 13:23 | 25.5 | 44 | ENE     | 13 | 1018.1 | 34   | 22 | N       | 9  | 1012   |
| 20-Se<br>P | 18.4 | 36.2 | 0 | SSW     | 30 | 12:23 | 28   | 42 | N       | 20 | 1016.8 | 35.1 | 17 | WS<br>W | 9  | 1011.6 |
| 21-Se<br>P | 14.1 | 37.8 | 0 | SE      | 41 | 14:11 | 28.7 | 40 | N       | 20 | 1016.3 | 36   | 13 | SE      | 30 | 1011.6 |
| 22-Se<br>P | 16.2 | 38.2 | 0 | SE      | 44 | 13:10 | 26.7 | 21 | SE      | 19 | 1016   | 37.3 | 9  | SE      | 24 | 1010.8 |
| 23-Se<br>P | 16.3 | 36.5 | 0 | E       | 37 | 20:56 | 27.5 | 30 | NE      | 17 | 1016.3 | 35.8 | 18 | N       | 9  | 1011.1 |
| 24-Se<br>P | 18.1 | 34   | 0 | ESE     | 37 | 10:26 | 25.4 | 45 | E       | 20 | 1017.6 | 32.4 | 18 | SE      | 19 | 1012   |
| 25-Se<br>P | 17.3 | 33.8 | 0 | E       | 46 | 09:30 | 25.2 | 41 | ENE     | 28 | 1017.7 | 32.6 | 15 | SSE     | 13 | 1012   |
| 26-Se<br>P | 13.1 | 33.9 | 0 | ESE     | 39 | 14:34 | 25.3 | 44 | ENE     | 20 | 1018.6 | 33   | 17 | SE      | 26 | 1012.9 |
| 27-Se<br>P | 13.2 | 34.6 | 0 | E       | 46 | 13:15 | 26.1 | 43 | NE      | 19 | 1019.2 | 33.7 | 14 | ESE     | 31 | 1014.2 |
| 28-Se<br>P | 13   | 36.6 | 0 | E       | 52 | 11:45 | 26.9 | 27 | NE      | 17 | 1020.5 | 35.2 | 14 | ESE     | 30 | 1015.3 |
| 29-Se<br>P | 15.2 | 36.2 | 0 | E       | 61 | 13:52 | 26.3 | 30 | ENE     | 24 | 1020.2 | 35.2 | 15 | ESE     | 24 | 1014.8 |
| 30-Se<br>P | 15.7 | 34.6 | 0 | ENE     | 48 | 15:58 | 24.2 | 39 | E       | 15 | 1019.9 | 33.6 | 17 | ESE     | 17 | 1013.2 |
| 1-Oct      | 17.4 | 35.6 | 0 | SE      | 39 | 13:09 | 27.5 | 35 | NE      | 19 | 1016.8 | 33.8 | 16 | SSE     | 15 | 1011.8 |
| 2-Oct      | 13.9 | 35.9 | 0 | E       | 41 | 12:46 | 27   | 40 | ENE     | 13 | 1018   | 34.1 | 19 | E       | 20 | 1012   |

|        |      |      |   |         |    |       |      |    |         |    |        |      |    |         |    |        |
|--------|------|------|---|---------|----|-------|------|----|---------|----|--------|------|----|---------|----|--------|
| 3-Oct  | 16.2 | 35.9 | 0 | WN<br>W | 30 | 14:14 | 26.9 | 47 | NN<br>E | 13 | 1016.5 | 35   | 20 | WN<br>W | 13 | 1011   |
| 4-Oct  | 19.1 | 35.4 | 0 | W       | 44 | 16:19 | 28.1 | 46 | W       | 20 | 1016.9 | 34.9 | 30 | WS<br>W | 24 | 1011.6 |
| 5-Oct  | 13.9 | 33.1 | 0 | SE      | 44 | 08:17 | 22.7 | 18 | SE      | 31 | 1020.4 | 32   | 12 | SSE     | 13 | 1015.1 |
| 6-Oct  | 12.8 | 35.1 | 0 | S       | 31 | 12:20 | 23.2 | 19 | SE      | 19 | 1019.4 | 34.2 | 10 | SSE     | 24 | 1013.6 |
| 7-Oct  | 13.6 | 37.2 | 0 | ESE     | 33 | 22:50 | 26.6 | 30 | NE      | 13 | 1016.8 | 36.1 | 17 | NW      | 11 | 1012.1 |
| 8-Oct  | 23.3 | 35   | 0 | E       | 43 | 12:53 | 27.3 | 43 | NE      | 22 | 1019.2 | 33.9 | 24 | E       | 20 | 1014.6 |
| 9-Oct  | 18.2 | 34.1 | 0 | E       | 41 | 13:38 | 25.2 | 45 | NE      | 13 | 1020.9 | 32.7 | 20 | E       | 13 | 1014.2 |
| 10-Oct | 17   | 35   | 0 | S       | 28 | 16:56 | 26.8 | 43 | NN<br>E | 13 | 1017.7 | 33.1 | 22 | E       | 11 | 1012.7 |
| 11-Oct | 16.9 | 36.8 | 0 | E       | 43 | 13:26 | 28.5 | 37 | E       | 17 | 1017.7 | 35.5 | 16 | ENE     | 13 | 1013.5 |
| 12-Oct | 18.2 | 36.2 | 0 | E       | 48 | 10:19 | 30.7 | 21 | ENE     | 22 | 1019.2 | 35.1 | 15 | SE      | 24 | 1014.4 |
| 13-Oct | 19   | 38.1 | 0 | SSW     | 39 | 15:57 | 30.3 | 25 | NN<br>E | 11 | 1017.5 | 37.3 | 13 | SSW     | 20 | 1013.2 |
| 14-Oct | 13.6 | 37.2 | 0 | SSW     | 30 | 15:27 | 26.4 | 15 | SE      | 17 | 1016.7 | 36.8 | 10 | SSW     | 13 | 1011.4 |
| 15-Oct | 13.1 | 38.9 | 0 | NW      | 35 | 10:36 | 29.9 | 19 | N       | 17 | 1015.5 | 36.2 | 11 | N       | 9  | 1010.7 |
| 16-Oct | 14.9 | 38.4 | 0 | SSW     | 48 | 14:37 | 29.6 | 10 | WN<br>W | 19 | 1015.4 | 36.9 | 8  | SSW     | 17 | 1011.7 |
| 17-Oct | 15   | 38.7 | 0 | SE      | 48 | 08:37 | 29.6 | 16 | SE      | 30 | 1016.2 | 37.3 | 9  | SSW     | 6  | 1012   |
| 18-Oct | 17   | 39   | 0 | N       | 31 | 09:27 | 31   | 15 | NN<br>E | 17 | 1016.8 | 37.3 | 14 | N       | 6  | 1012.5 |
| 19-Oct | 21.5 | 37.5 | 0 | SE      | 44 | 18:56 | 28.9 | 41 | NN<br>E | 9  | 1016.7 | 35.1 | 22 | NN<br>E | 9  | 1011.6 |
| 20-Oct | 21.1 | 38.8 | 0 | NE      | 52 | 12:42 | 31.3 | 33 | N       | 19 | 1014.7 | 36.4 | 19 | ENE     | 17 | 1009.5 |
| 21-Oct | 24.1 | 38.8 | 0 | SW      | 44 | 18:12 | 31.6 | 32 | N       | 28 | 1014.2 | 37.9 | 19 | WS<br>W | 2  | 1009.4 |
| 22-Oct | 21.3 | 39.5 | 0 | ESE     | 50 | 16:03 | 32.3 | 31 | NN<br>W | 28 | 1015.4 | 36.8 | 21 | NW      | 22 | 1010   |
| 23-Oct | 16.1 | 39.6 | 0 | SSW     | 44 | 15:32 | 31.7 | 16 | SSE     | 19 | 1015   | 38.2 | 8  | S       | 7  | 1009.9 |
| 24-Oct | 17.3 | 40.5 | 0 | WS<br>W | 33 | 14:10 | 33   | 13 | ENE     | 11 | 1013.2 | 39.5 | 8  | SW      | 22 | 1008.7 |
| 25-Oct | 17   | 41.8 | 0 | NN<br>W | 41 | 08:48 | 33.5 | 26 | N       | 28 | 1013.3 | 41   | 10 | ESE     | 9  | 1008.4 |
| 26-Oct | 17.2 | 38.1 | 0 | S       | 50 | 15:51 | 28.2 | 19 | SE      | 26 | 1015.7 | 36.5 | 11 | S       | 24 | 1011   |
| 27-Oct | 17.7 | 34.2 | 0 | SE      | 56 | 08:29 | 23.4 | 14 | ESE     | 39 | 1019   | 33.4 | 9  | SSE     | 28 | 1013.3 |
| 28-Oct | 16   | 37.5 | 0 | ESE     | 39 | 21:50 | 27.9 | 31 | E       | 20 | 1016.4 | 37   | 18 | W       | 15 | 1012   |

|        |      |      |   |         |    |       |      |    |         |    |        |      |    |     |    |        |
|--------|------|------|---|---------|----|-------|------|----|---------|----|--------|------|----|-----|----|--------|
| 29-Oct | 17.8 | 37.1 | 0 | E       | 33 | 22:50 | 27.2 | 44 | NE      | 11 | 1016.4 | 36.2 | 15 | WNW | 7  | 1010.5 |
| 30-Oct | 22.1 | 38   | 0 | NN<br>E | 33 | 07:26 | 28.6 | 38 | NE      | 15 | 1015.4 | 36.8 | 18 | SE  | 9  | 1009.9 |
| 31-Oct | 19.1 | 39.9 | 0 | SSE     | 35 | 16:09 | 29.2 | 32 | NN<br>E | 15 | 1016.2 | 38.6 | 11 | S   | 15 | 1010   |
| 1-Nov  | 18.2 | 41.1 | 0 | S       | 28 | 14:27 | 32.3 | 20 | N       | 13 | 1013.6 | 40.6 | 10 | S   | 17 | 1008.5 |
| 2-Nov  | 21.1 | 41.7 | 0 | SW      | 35 | 14:58 | 34.4 | 12 | NN<br>W | 20 | 1012.2 | 41.2 | 10 | SW  | 24 | 1007.2 |
| 3-Nov  | 20.9 | 41.4 | 0 | SSW     | 35 | 15:02 | 29.8 | 25 | NN<br>E | 11 | 1012.1 | 41.3 | 12 | S   | 19 | 1006.4 |
| 4-Nov  | 21.6 | 40.8 | 0 | SE      | 31 | 22:15 | 31.5 | 38 | NN<br>E | 17 | 1011.9 | 40   | 18 | WSW | 17 | 1007.1 |
| 5-Nov  | 24.7 | 39.5 | 0 | SW      | 43 | 16:17 | 32.2 | 40 | NW      | 24 | 1012.8 | 38.6 | 14 | WNW | 15 | 1008.3 |
| 6-Nov  | 18.9 | 39.7 | 0 | NW      | 37 | 13:55 | 29.8 | 45 | NN<br>E | 17 | 1012   | 38.3 | 14 | N   | 17 | 1006.5 |
| 7-Nov  | 24.3 | 39.2 | 0 | ESE     | 48 | 21:04 | 28.8 | 45 | NE      | 19 | 1013   | 37.4 | 16 | N   | 9  | 1006.7 |
| 8-Nov  | 24.2 | 37.8 | 0 | SE      | 57 | 17:01 | 30.3 | 41 | NN<br>E | 15 | 1013   | 36.6 | 27 | ESE | 7  | 1006.5 |
| 9-Nov  | 24.1 | 39   | 0 | SSE     | 37 | 15:03 | 30.3 | 45 | NE      | 19 | 1013.9 | 37.1 | 22 | ENE | 9  | 1007.6 |
| 10-Nov | 24.2 | 37.4 | 0 | S       | 37 | 02:06 | 30.8 | 43 | N       | 22 | 1013.7 | 35.5 | 24 | SE  | 13 | 1009.7 |
| 11-Nov | 26.1 | 40.1 | 0 | ESE     | 46 | 15:53 | 32   | 33 | NN<br>E | 19 | 1015.3 | 38.3 | 15 | E   | 22 | 1010.5 |
| 12-Nov | 22.4 | 39.8 | 0 | ESE     | 50 | 16:12 | 31.4 | 33 | ENE     | 9  | 1015.8 | 37.4 | 20 | ESE | 24 | 1010.2 |
| 13-Nov | 21.2 | 39.1 | 0 | SE      | 61 | 16:14 | 30.5 | 37 | NN<br>E | 15 | 1014.3 | 38.5 | 14 | E   | 20 | 1008.4 |
| 14-Nov | 17.7 | 41.1 | 0 | E       | 44 | 15:06 | 32.4 | 27 | N       | 17 | 1012.7 | 39.5 | 11 | E   | 17 | 1007.7 |
| 15-Nov | 19.3 | 41.6 | 0 |         |    |       | 32.2 | 24 | N       | 20 | 1012.5 | 40.3 | 13 | SE  | 11 | 1007.2 |

|                |          |          |          |         |    |           |      |    |         |    |            |      |    |         |    |            |
|----------------|----------|----------|----------|---------|----|-----------|------|----|---------|----|------------|------|----|---------|----|------------|
| 16-<br>No<br>v | 25.<br>4 | 42       |          |         |    |           | 34.4 | 38 | NW      | 26 | 1011.<br>3 | 39.1 | 21 | NW      | 19 | 1007.<br>1 |
| 17-<br>No<br>v | 26.<br>6 | 42.<br>2 |          | SSW     | 59 | 19:<br>28 | 36.1 | 22 | E       | 17 | 1010       | 41.6 | 17 | SSW     | 20 | 1006.<br>4 |
| 18-<br>No<br>v | 24.<br>2 | 42.<br>6 | 0        | S       | 37 | 14:<br>18 | 34.5 | 25 | E       | 20 | 1010.<br>9 | 41.8 | 15 | W       | 17 | 1006       |
| 19-<br>No<br>v | 26.<br>9 | 38.<br>9 | 0        | SSW     | 59 | 15:<br>25 | 34.8 | 27 | NW      | 28 | 1012.<br>3 | 35.2 | 31 | SSW     | 35 | 1010.<br>4 |
| 20-<br>No<br>v | 21.<br>5 | 34.<br>6 | 0.6      | E       | 39 | 02:<br>25 | 29.7 | 51 | ENE     | 20 | 1014.<br>4 | 33.6 | 29 | SSE     | 13 | 1011.<br>2 |
| 21-<br>No<br>v | 24.<br>6 | 37.<br>5 | 0        | NE      | 50 | 19:<br>37 | 29   | 52 | NN<br>E | 15 | 1013.<br>6 | 36.8 | 25 | SW      | 13 | 1009.<br>7 |
| 22-<br>No<br>v | 21.<br>9 | 39.<br>2 | 0        | SSW     | 65 | 15:<br>15 | 31.4 | 44 | N       | 13 | 1013.<br>5 | 38.3 | 26 | S       | 19 | 1007.<br>1 |
| 23-<br>No<br>v | 21.<br>3 | 35.<br>8 | 16.<br>2 | SSE     | 39 | 00:<br>25 | 26.2 | 66 | ENE     | 13 | 1012.<br>7 | 34.3 | 37 | S       | 13 | 1007.<br>9 |
| 24-<br>No<br>v | 24       | 30.<br>9 | 0        | SSE     | 41 | 14:<br>25 | 29.3 | 57 | NN<br>E | 9  | 1010.<br>7 | 25.1 | 78 | SSE     | 20 | 1010.<br>2 |
| 25-<br>No<br>v | 20.<br>9 | 35.<br>3 | 0.6      | W       | 31 | 13:<br>41 | 26.9 | 63 | NN<br>E | 11 | 1010.<br>6 | 33.7 | 37 | WS<br>W | 15 | 1006.<br>5 |
| 26-<br>No<br>v | 23.<br>7 | 37       | 0        | NE      | 41 | 13:<br>40 | 29.7 | 61 | N       | 11 | 1009.<br>5 | 28.5 | 76 | NW      | 6  | 1005.<br>8 |
| 27-<br>No<br>v | 21.<br>8 | 30.<br>8 | 23.<br>6 | W       | 54 | 19:<br>33 | 22.3 | 97 | ESE     | 9  | 1010.<br>2 | 29   | 68 | NN<br>E | 11 | 1005.<br>9 |
| 28-<br>No<br>v | 20.<br>8 | 36.<br>3 | 21       | NN<br>W | 31 | 08:<br>15 | 28.3 | 71 | N       | 17 | 1010.<br>3 | 35   | 40 | NW      | 9  | 1006.<br>2 |
| 29-<br>No<br>v | 22       | 39.<br>8 | 0        | NN<br>W | 33 | 11:<br>03 | 32.5 | 56 | NW      | 17 | 1009.<br>4 | 38.1 | 28 | N       | 13 | 1005.<br>5 |
| 30-<br>No<br>v | 24.<br>2 | 38.<br>5 | 0        | S       | 56 | 14:<br>47 | 33.3 | 46 | N       | 9  | 1008.<br>8 | 26.4 | 73 | SSW     | 35 | 1005.<br>6 |
| 1-<br>De<br>c  | 23.<br>5 | 38.<br>8 | 2.6      | W       | 48 | 16:<br>36 | 31.9 | 52 | NW      | 26 | 1008.<br>4 | 38   | 36 | NW      | 26 | 1003.<br>9 |
| 2-<br>De<br>c  | 23.<br>1 | 30.<br>6 | 1.2      | SW      | 44 | 12:<br>47 | 23.1 | 87 | N       | 17 | 1011.<br>1 | 28.2 | 66 | ENE     | 11 | 1008.<br>7 |

|                |          |          |     |         |    |           |      |    |         |    |            |      |    |         |    |            |
|----------------|----------|----------|-----|---------|----|-----------|------|----|---------|----|------------|------|----|---------|----|------------|
| 3-<br>De<br>c  | 23       | 38.<br>9 | 0   | SSE     | 50 | 19:<br>42 | 30.6 | 59 | NN<br>W | 20 | 1011.<br>9 | 38.2 | 31 | WS<br>W | 11 | 1007.<br>6 |
| 4-<br>De<br>c  | 24.<br>8 | 40.<br>5 | 0.2 | SSE     | 35 | 15:<br>40 | 33   | 44 | NW      | 11 | 1011.<br>3 | 40.1 | 20 | SE      | 17 | 1006.<br>8 |
| 5-<br>De<br>c  | 23.<br>5 | 40.<br>6 | 0   | ESE     | 39 | 12:<br>36 | 33.7 | 39 | NW      | 11 | 1011.<br>9 | 40.2 | 22 | E       | 24 | 1006.<br>8 |
| 6-<br>De<br>c  | 24.<br>3 | 40.<br>2 | 0   | ESE     | 44 | 12:<br>42 | 31.8 | 38 | NE      | 15 | 1014       | 38.4 | 21 | ESE     | 31 | 1008.<br>7 |
| 7-<br>De<br>c  | 20.<br>8 | 38.<br>1 | 0   | ESE     | 52 | 14:<br>01 | 31.8 | 40 | ENE     | 9  | 1012.<br>2 | 37.9 | 20 | E       | 30 | 1007.<br>5 |
| 8-<br>De<br>c  | 19.<br>5 | 37.<br>7 | 0   | E       | 46 | 15:<br>38 | 30.2 | 45 | ENE     | 15 | 1012.<br>7 | 36.8 | 19 | ESE     | 9  | 1007.<br>6 |
| 9-<br>De<br>c  | 20.<br>9 | 38.<br>7 | 0   | E       | 35 | 22:<br>38 | 30.4 | 42 | NN<br>E | 11 | 1011.<br>2 | 37.5 | 17 | WS<br>W | 9  | 1005.<br>9 |
| 10-<br>De<br>c | 23.<br>9 | 38.<br>8 | 0   | S       | 35 | 12:<br>58 | 31.2 | 42 | NN<br>E | 17 | 1009       | 37.9 | 24 | ESE     | 7  | 1002.<br>8 |
| 11-<br>De<br>c | 23.<br>2 | 39.<br>6 | 0   | E       | 46 | 22:<br>28 | 31.7 | 43 | NE      | 17 | 1007.<br>6 | 38.9 | 25 | SSW     | 19 | 1002.<br>8 |
| 12-<br>De<br>c | 26.<br>1 | 39.<br>8 | 0   | E       | 56 | 21:<br>12 | 30.7 | 53 | ESE     | 24 | 1008.<br>4 | 38.8 | 33 | ESE     | 28 | 1003.<br>2 |
| 13-<br>De<br>c | 26.<br>3 | 40       | 0   | E       | 46 | 20:<br>31 | 31.4 | 47 | ENE     | 24 | 1008.<br>8 | 37.3 | 32 | E       | 22 | 1004.<br>4 |
| 14-<br>De<br>c | 24.<br>4 | 39.<br>8 | 0   | NE      | 43 | 16:<br>45 | 31.2 | 50 | NE      | 22 | 1008.<br>6 | 37.3 | 37 | NE      | 22 | 1004       |
| 15-<br>De<br>c | 24.<br>6 | 39.<br>4 | 0   | NE      | 37 | 17:<br>13 | 29.8 | 57 | ENE     | 20 | 1007.<br>8 | 38   | 34 | ENE     | 13 | 1003.<br>4 |
| 16-<br>De<br>c | 25.<br>6 | 38.<br>3 | 0   | NE      | 43 | 17:<br>43 | 30.5 | 54 | NE      | 17 | 1007.<br>5 | 35.5 | 34 | ENE     | 20 | 1003.<br>7 |
| 17-<br>De<br>c | 25.<br>5 | 37.<br>8 | 0   | NN<br>E | 43 | 13:<br>30 | 32.1 | 51 | ENE     | 22 | 1007.<br>9 | 30.2 | 61 | NE      | 28 | 1004.<br>8 |
| 18-<br>De<br>c | 23.<br>6 | 38.<br>5 | 0   | NE      | 41 | 20:<br>32 | 30.4 | 47 | ENE     | 17 | 1009.<br>2 | 37.5 | 31 | NE      | 13 | 1004.<br>9 |
| 19-<br>De<br>c | 23.<br>9 | 41.<br>2 | 0   | S       | 56 | 22:<br>26 | 31.3 | 38 | NE      | 17 | 1009.<br>2 | 39.9 | 23 | NN<br>E | 9  | 1003.<br>6 |

<sup>1</sup>Dir is wind direction. <sup>2</sup> Spd is wind speed. <sup>3</sup>RH is relative humidity. <sup>4</sup> MSLP is mean sea level pressure.

**Table S2.** Weather variables (evaporation and temperature humidity index [THI]) during the experimental period – Trial 2 at Wilburra Downs (Richmond, QLD – Australia).

| Date         | Variable                      |                  |
|--------------|-------------------------------|------------------|
|              | Evaporation (mm) <sup>1</sup> | THI <sup>2</sup> |
| 11 Sept 2023 | 7.2                           | 70               |
| 12 Sept 2023 | 6.9                           | 66               |
| 13 Sept 2023 | 6.9                           | 66               |
| 14 Sept 2023 | 7.1                           | 66               |
| 15 Sept 2023 | 6.7                           | 65               |
| 16 Sept 2023 | 6.8                           | 65               |
| 17 Sept 2023 | 7.3                           | 67               |
| 18 Sept 2023 | 7.2                           | 67               |
| 19 Sept 2023 | 7.4                           | 70               |
| 20 Sept 2023 | 8.2                           | 72               |
| 21 Sept 2023 | 8.0                           | 70               |
| 22 Sept 2023 | 9.0                           | 70               |
| 23 Sept 2023 | 8.3                           | 70               |
| 24 Sept 2023 | 7.7                           | 71               |
| 25 Sept 2023 | 7.8                           | 70               |
| 26 Sept 2023 | 7.1                           | 68               |
| 27 Sept 2023 | 7.3                           | 68               |
| 28 Sept 2023 | 8.0                           | 68               |
| 29 Sept 2023 | 8.1                           | 70               |
| 30 Sept 2023 | 7.7                           | 70               |
| 1 Oct 2023   | 8.2                           | 71               |
| 2 Oct 2023   | 7.5                           | 69               |
| 3 Oct 2023   | 7.6                           | 71               |
| 4 Oct 2023   | 7.7                           | 73               |
| 5 Oct 2023   | 8.0                           | 67               |
| 6 Oct 2023   | 8.1                           | 67               |
| 7 Oct 2023   | 8.0                           | 69               |
| 8 Oct 2023   | 8.5                           | 75               |
| 9 Oct 2023   | 7.7                           | 71               |
| 10 Oct 2023  | 7.7                           | 71               |
| 11 Oct 2023  | 8.2                           | 71               |
| 12 Oct 2023  | 8.8                           | 70               |
| 13 Oct 2023  | 9.2                           | 72               |
| 14 Oct 2023  | 8.6                           | 68               |
| 15 Oct 2023  | 8.6                           | 69               |
| 16 Oct 2023  | 9.2                           | 69               |
| 17 Oct 2023  | 9.0                           | 69               |
| 18 Oct 2023  | 9.3                           | 71               |
| 19 Oct 2023  | 8.8                           | 75               |
| 20 Oct 2023  | 9.2                           | 74               |
| 21 Oct 2023  | 9.8                           | 76               |
| 22 Oct 2023  | 9.4                           | 75               |
| 23 Oct 2023  | 9.4                           | 70               |
| 24 Oct 2023  | 9.8                           | 71               |
| 25 Oct 2023  | 9.5                           | 73               |
| 26 Oct 2023  | 9.1                           | 71               |
| 27 Oct 2023  | 8.8                           | 68               |

---

|             |      |    |
|-------------|------|----|
| 28 Oct 2023 | 8.3  | 71 |
| 29 Oct 2023 | 8.3  | 72 |
| 30 Oct 2023 | 9.1  | 75 |
| 31 Oct 2023 | 9.3  | 73 |
| 1 Nov 2023  | 9.8  | 72 |
| 2 Nov 2023  | 10.6 | 73 |
| 3 Nov 2023  | 10.1 | 74 |
| 4 Nov 2023  | 9.5  | 76 |
| 5 Nov 2023  | 9.9  | 77 |
| 6 Nov 2023  | 8.8  | 74 |
| 7 Nov 2023  | 9.5  | 77 |
| 8 Nov 2023  | 9.1  | 77 |
| 9 Nov 2023  | 9.3  | 77 |
| 10 Nov 2023 | 9.0  | 77 |
| 11 Nov 2023 | 10.4 | 77 |
| 12 Nov 2023 | 9.6  | 76 |
| 13 Nov 2023 | 9.3  | 75 |
| 14 Nov 2023 | 9.5  | 73 |
| 15 Nov 2023 | 9.8  | 74 |
| 16 Nov 2023 | 10.3 | 79 |
| 17 Nov 2023 | 11.2 | 78 |
| 18 Nov 2023 | 10.8 | 77 |
| 19 Nov 2023 | 10.0 | 78 |
| 20 Nov 2023 | 7.8  | 74 |
| 21 Nov 2023 | 8.8  | 78 |
| 22 Nov 2023 | 8.9  | 76 |
| 23 Nov 2023 | 7.3  | 77 |
| 24 Nov 2023 | 6.1  | 77 |
| 25 Nov 2023 | 7.3  | 76 |
| 26 Nov 2023 | 6.8  | 82 |
| 27 Nov 2023 | 5.0  | 77 |
| 28 Nov 2023 | 7.1  | 77 |
| 29 Nov 2023 | 8.6  | 78 |
| 30 Nov 2023 | 7.6  | 82 |
| 1 Dec 2023  | 8.5  | 79 |
| 2 Dec 2023  | 5.4  | 77 |
| 3 Dec 2023  | 8.4  | 79 |
| 4 Dec 2023  | 9.8  | 78 |
| 5 Dec 2023  | 9.7  | 77 |
| 6 Dec 2023  | 9.8  | 77 |
| 7 Dec 2023  | 8.8  | 74 |
| 8 Dec 2023  | 8.4  | 74 |
| 9 Dec 2023  | 9.0  | 75 |
| 10 Dec 2023 | 9.3  | 77 |
| 11 Dec 2023 | 9.2  | 77 |
| 12 Dec 2023 | 9.2  | 81 |
| 13 Dec 2023 | 9.5  | 80 |
| 14 Dec 2023 | 8.9  | 80 |
| 15 Dec 2023 | 8.7  | 80 |
| 16 Dec 2023 | 8.8  | 80 |
| 17 Dec 2023 | 7.9  | 81 |

---

|             |     |    |
|-------------|-----|----|
| 18 Dec 2023 | 8.8 | 78 |
| 19 Dec 2023 | 9.8 | 78 |

---

<sup>1</sup> Evaporation (mm) was calculated according suggested by Linacre (1977) <sup>2</sup> THI was calculated according suggested by Copley *et al.* [12].

## References

10. BOM. *Bureau of Meteorology - Average annual, seasonal and monthly rainfall*. Available online: <http://www.bom.gov.au/climate/dwo/IDCJDW4100.latest.shtml> (Accessed on 28 December 2023).
12. Copley, J.P.; Engle, B.N.; Ross, E.M.; Speight, S.; Fordyce, G.; Wood, B.J.; Voss-Fels, K.P.; Hayes, B.J. Environmental variation effects fertility in tropical beef cattle. *Transl. Anim. Sci.* **2022**, *v.6 n.2*. txac035. <https://doi.org/10.1093/tas/txac035>.
